# Supplementary material for: Biological expressions of early life trauma in the immune system of older adults
Source: PubMed Central journal article supplement (PMC10284407; doi:10.1371/journal.pone.0286141), 2023-06-21

**S1 Figure.** Sample flow chart showing how the study sample was derived, n = 5,823.

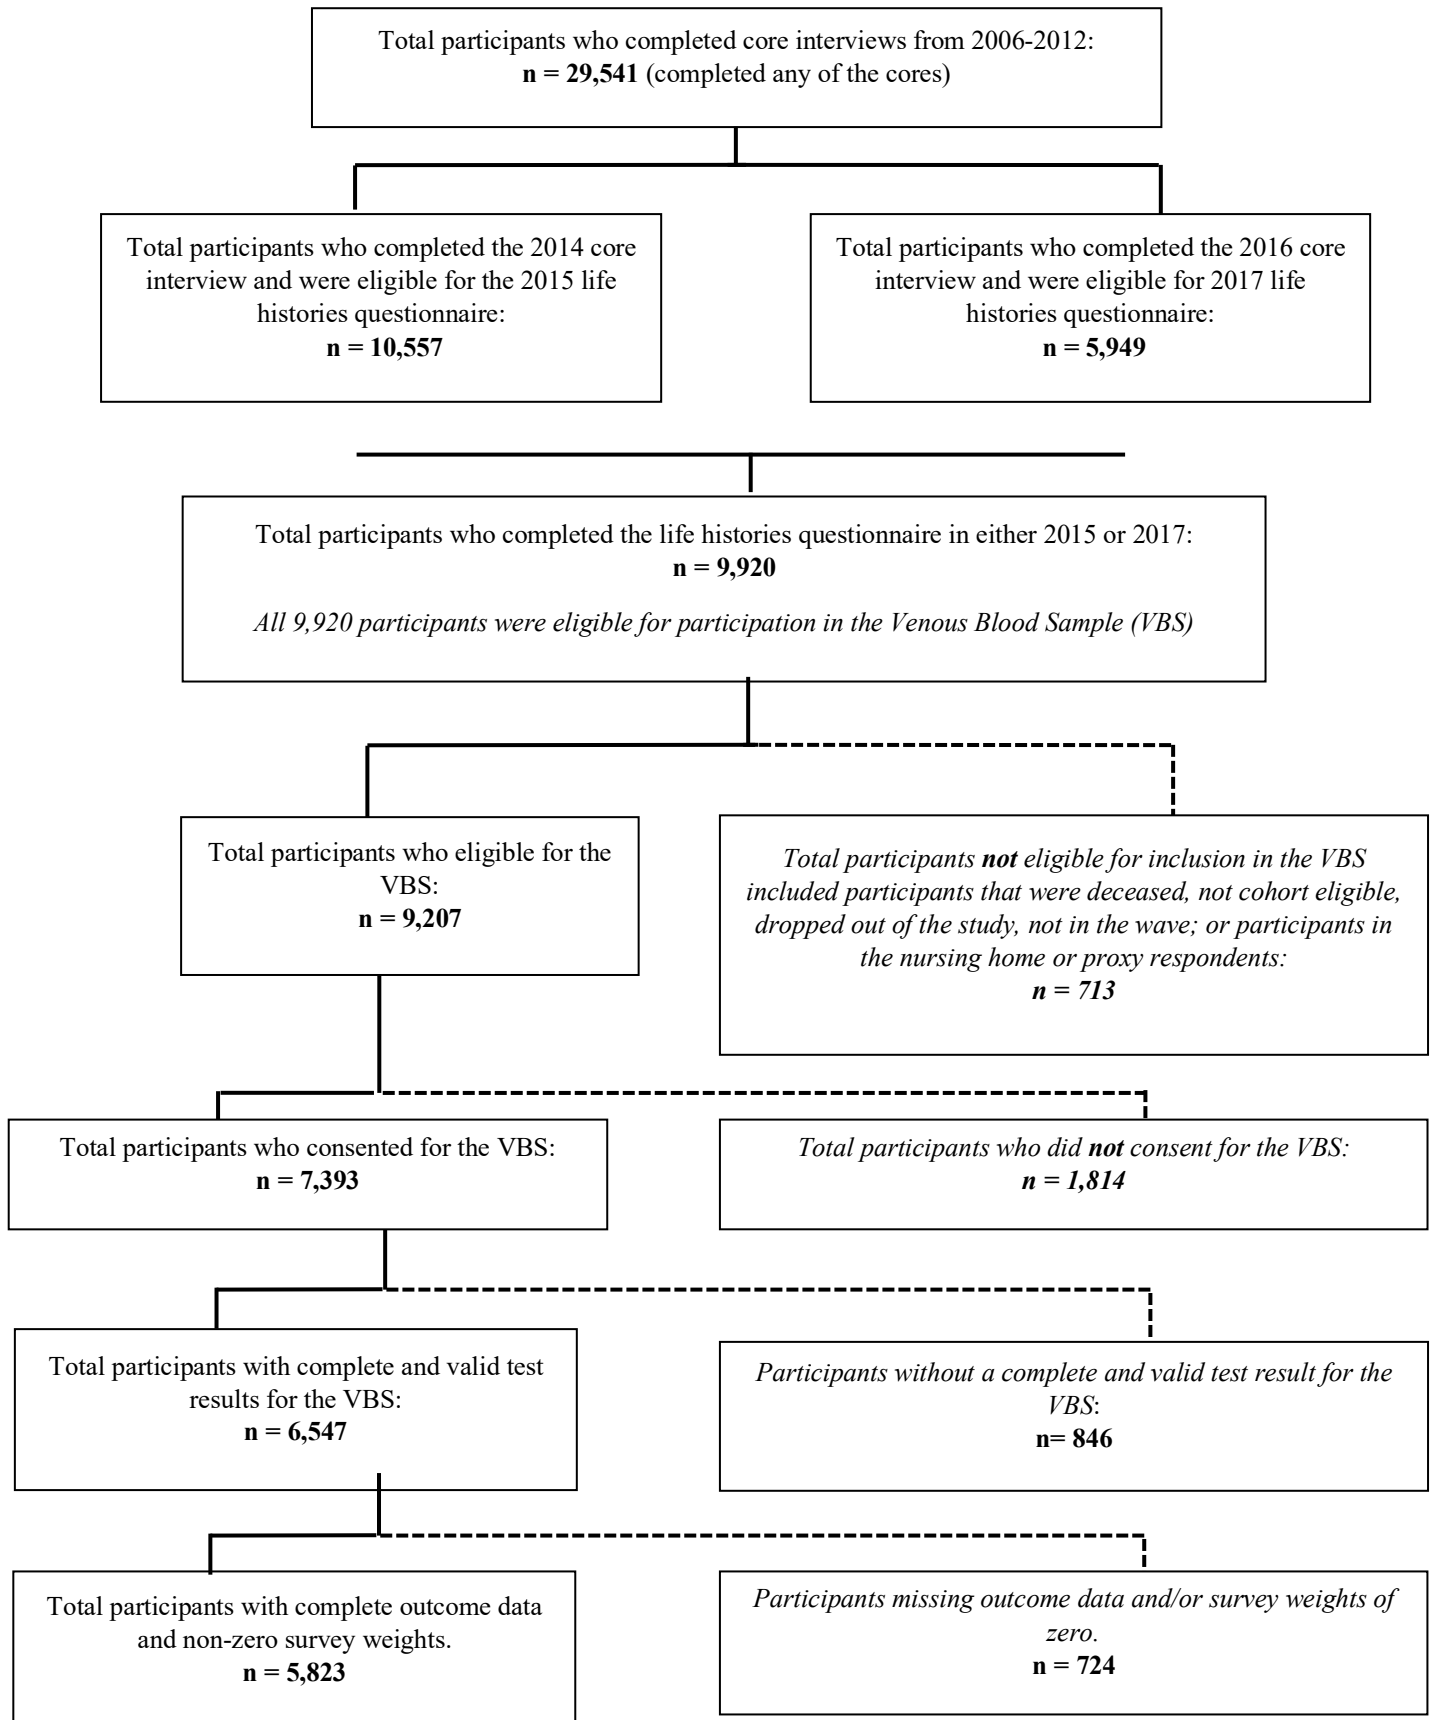

Supplement: pone.0286141.s004.pdf [file pone.0286141.s004.pdf]
