# Supplementary material for: Biological expressions of early life trauma in the immune system of older adults
Source: PubMed Central journal article supplement (PMC10284407; doi:10.1371/journal.pone.0286141), 2023-06-21
Supplement: pone.0286141.s005.pdf [file pone.0286141.s005.pdf]

**S1 Table.** Exponentiated regression coefficients estimating the association between experiencing parental/caregiver loss before the age of 16 years and CMV, sTNFR, IL-6, and CRP. **Model 1** controls for age at the baseline interview in 2016 and gender. **Model 2** includes additional controls for parental education. **Model 3** includes additional controls for race/ethnicity. **Model 4** includes additional controls for participant education, smoking status, change in self-reported health, self-report of a chance in health status, chronic conditions index, change in functional limitations, and BMI.

|                                                          | CMV      |           |          |           |          |              |          |           | sTNFR    |               |          |               |          |                |          |              |
|----------------------------------------------------------|----------|-----------|----------|-----------|----------|--------------|----------|-----------|----------|---------------|----------|---------------|----------|----------------|----------|--------------|
|                                                          | Model 1  |           | Model 2  |           | Model 3  |              | Model 4  |           | Model 1  |               | Model 2  |               | Model 3  |                | Model 4  |              |
|                                                          | Estimate | CI        | Estimate | CI        | Estimate | CI           | Estimate | CI        | Estimate | CI            | Estimate | CI            | Estimate | CI             | Estimate | CI           |
| Intercept                                                | 0.59     | 0.45,0.77 | 4.98     | 3.5,7.08  | 1.92     | 1.31,2.81    | 2.92     | 1.35,6.33 | 618.42   | 615.49,621.37 | 684.20   | 680.21,688.21 | 693.20   | 689.1,697.32   | 485.30   | 479.57,491.1 |
| Experienced Parental/Caregiver Loss                      | 1.34     | 1.3,1.39  | 1.14     | 1.11,1.18 | 1.03     | 1.1,1.06     | 0.98     | 0.95,1.01 | 1.03     | 1.03,1.04     | 1.03     | 1.02,1.03     | 1.03     | 1.0263,1.0345  | 1.01     | 1.01,1.02    |
| Age (Years)                                              | 1.04     | 1.04,1.04 | 1.03     | 1.03,1.03 | 1.035    | 1.0347,1.035 | 1.04     | 1.03,1.04 | 1.0147   | 1.0146,1.0147 | 1.01     | 1.014,1.0141  | 1.014    | 1.0139,1.014   | 1.012    | 1.012,1.013  |
| Gender (Male vs Female)                                  | 2.19     | 2.15,2.23 | 2.04     | 2.01,2.08 | 2.00     | 1.97,2.03    | 2.02     | 1.98,2.05 | 1.004    | 1.0036,1.0043 | 1.00     | 0.9991,0.9997 | 0.9994   | 0.99903,0.9997 | 0.995    | 0.995,0.996  |
| Parental Education (Higher Values = Higher Education)    |          |           | 0.58     | 0.58,0.58 | 0.65     | 0.64,0.65    | 0.68     | 0.68,0.69 |          |               | 0.97     | 0.9696,0.9701 | 0.97     | 0.968,0.97     | 0.99     | 0.991,0.992  |
| Race/Ethnicity: NH-Black                                 |          |           |          |           | 4.35     | 4.19,4.51    | 3.96     | 3.82,4.12 |          |               |          |               | 0.99     | 0.987,0.99     | 0.94     | 0.941,0.945  |
| Hispanic                                                 |          |           |          |           | 3.30     | 3.08,3.53    | 3.24     | 3.03,3.47 |          |               |          |               | 1.00     | 0.99,1.        | 0.99     | 0.986,0.994  |
| Other Race                                               |          |           |          |           | 4.19     | 3.77,4.66    | 4.25     | 3.81,4.74 |          |               |          |               | 0.94     | 0.94,0.94      | 0.93     | 0.93,0.94    |
| Participant Education (Higher Values = Higher Education) |          |           |          |           |          |              | 0.82     | 0.81,0.82 |          |               |          |               |          |                | 0.96     | 0.961,0.962  |
| Smoking Status                                           |          |           |          |           |          |              | 1.13     | 1.11,1.14 |          |               |          |               |          |                | 1.00     | 1.001,1.002  |
| Change in Self-Reported Health                           |          |           |          |           |          |              | 0.99     | 0.98,0.99 |          |               |          |               |          |                | 0.99     | 0.994,0.995  |
| Self-Report of Health Change                             |          |           |          |           |          |              | 0.89     | 0.88,0.9  |          |               |          |               |          |                | 1.02     | 1.02,1.021   |
| Chronic Condition Index                                  |          |           |          |           |          |              | 1.03     | 1.03,1.04 |          |               |          |               |          |                | 1.056    | 1.055,1.056  |
| Change in Functional Limitations                         |          |           |          |           |          |              | 0.86     | 0.85,0.87 |          |               |          |               |          |                | 1.04     | 1.037,1.038  |
| BMI                                                      |          |           |          |           |          |              | 1.01     | 1.1,1.01  |          |               |          |               |          |                | 1.01     | 1.011,1.012  |

  

|                                                          | IL-6     |               |          |               |          |           |          |               | CRP      |               |          |               |          |             |          |             |
|----------------------------------------------------------|----------|---------------|----------|---------------|----------|-----------|----------|---------------|----------|---------------|----------|---------------|----------|-------------|----------|-------------|
|                                                          | Model 1  |               | Model 2  |               | Model 3  |           | Model 4  |               | Model 1  |               | Model 2  |               | Model 3  |             | Model 4  |             |
|                                                          | Estimate | CI            | Estimate | CI            | Estimate | CI        | Estimate | CI            | Estimate | CI            | Estimate | CI            | Estimate | CI          | Estimate | CI          |
| Intercept                                                | 1.40     | 1.37,1.43     | 1.62     | 1.57,1.67     | 1.47     | 1.42,1.52 | 477.18   | 471.37,483.07 | 1.91     | 1.84,1.98     | 2.42     | 2.31,2.53     | 2.21     | 2.11,2.33   | 0.27     | 0.25,0.3    |
| Experienced Parental/Caregiver Loss                      | 1.09     | 1.09,1.1      | 1.0166   | 1.0166,1.0167 | 1.07     | 1.06,1.08 | 0.99     | 0.98,0.99     | 1.11     | 1.1,1.12      | 1.09     | 1.08,1.11     | 1.08     | 1.07,1.09   | 1.04     | 1.03,1.05   |
| Age (Years)                                              | 1.017    | 1.017,1.0171  | 0.9520   | 0.9505,0.9535 | 1.02     | 1.02,1.02 | 1.01     | 1.0125,1.0126 | 0.999    | 0.9992,0.9993 | 0.9977   | 0.9977,0.9978 | 1.00     | 0.998,0.999 | 1.00     | 1.001,1.002 |
| Gender (Male vs Female)                                  | 0.958    | 0.9566,0.9595 | 0.9406   | 0.94,0.9411   | 0.95     | 0.95,0.95 | 0.995    | 0.99,0.995    | 1.20     | 1.198,1.203   | 1.20     | 1.199,1.204   | 1.20     | 1.19,1.2    | 1.21     | 1.207,1.212 |
| Parental Education (Higher Values = Higher Education)    |          |               | 0.9685   | 0.9684,0.9686 | 0.95     | 0.95,0.95 | 0.991    | 0.9912,0.9917 |          |               | 0.92     | 0.921,0.923   | 0.93     | 0.931,0.933 | 0.98     | 0.98,0.98   |
| Race/Ethnicity: NH-Black                                 |          |               |          |               | 1.20     | 1.19,1.21 | 0.949    | 0.9468,0.9509 |          |               |          |               | 1.22     | 1.2,1.23    | 1.08     | 1.07,1.1    |
| Hispanic                                                 |          |               |          |               | 1.14     | 1.12,1.15 | 0.994    | 0.9905,0.9981 |          |               |          |               | 1.11     | 1.09,1.13   | 1.10     | 1.09,1.12   |
| Other Race                                               |          |               |          |               | 1.06     | 1.04,1.09 | 0.940    | 0.9365,0.9435 |          |               |          |               | 0.98     | 0.963,1.003 | 1.01     | 0.99,1.03   |
| Participant Education (Higher Values = Higher Education) |          |               |          |               |          |           | 0.961    | 0.9604,0.9609 |          |               |          |               |          |             | 0.95     | 0.95,0.96   |
| Smoking Status                                           |          |               |          |               |          |           | 1.004    | 1.003,1.004   |          |               |          |               |          |             | 1.12     | 1.121,1.125 |
| Change in Self-Reported Health                           |          |               |          |               |          |           | 0.995    | 0.9947,0.9951 |          |               |          |               |          |             | 0.99     | 0.99,0.992  |
| Self-Report of Health Change                             |          |               |          |               |          |           | 1.021    | 1.0203,1.021  |          |               |          |               |          |             | 1.06     | 1.06,1.065  |
| Chronic Condition Index                                  |          |               |          |               |          |           | 1.056    | 1.0561,1.0566 |          |               |          |               |          |             | 1.06     | 1.055,1.057 |
| Change in Functional Limitations                         |          |               |          |               |          |           | 1.037    | 1.0362,1.0372 |          |               |          |               |          |             | 1.06     | 1.059,1.064 |
| BMI                                                      |          |               |          |               |          |           | 1.012    | 1.0114,1.0117 |          |               |          |               |          |             | 1.05     | 1.053,1.054 |
