# Supplementary material for: Biological expressions of early life trauma in the immune system of older adults
Source: PubMed Central journal article supplement (PMC10284407; doi:10.1371/journal.pone.0286141), 2023-06-21
Supplement: pone.0286141.s006.pdf [file pone.0286141.s006.pdf]

**S2 Table.** Exponentiated regression coefficients estimating the association between experiencing parental separation before the age of 16 years and CMV, sTNFR, IL-6, and CRP. **Model 1** controls for age at the baseline interview in 2016 and gender. **Model 2** includes additional controls for parental education. **Model 3** includes additional controls for race/ethnicity. **Model 4** includes additional controls for participant education, smoking status, change in self-reported health, self-report of a chance in health status, chronic conditions index, change in functional limitations, and BMI.

|                                                          | CMV      |              |          |              |          |           |          |             | sTNFR    |                 |          |                 |          |               |          |               |
|----------------------------------------------------------|----------|--------------|----------|--------------|----------|-----------|----------|-------------|----------|-----------------|----------|-----------------|----------|---------------|----------|---------------|
|                                                          | Model 1  |              | Model 2  |              | Model 3  |           | Model 4  |             | Model 1  |                 | Model 2  |                 | Model 3  |               | Model 4  |               |
|                                                          | Estimate | CI           | Estimate | CI           | Estimate | CI        | Estimate | CI          | Estimate | CI              | Estimate | CI              | Estimate | CI            | Estimate | CI            |
| Intercept                                                | 0.60     | 0.46,0.77    | 5.68     | 4.02,8.02    | 2.25     | 1.55,3.28 | 3.44     | 1.6,7.41    | 605.72   | 603.12,608.33   | 675.26   | 671.34,679.2    | 682.07   | 678.04,686.13 | 477.18   | 471.37,483.07 |
| Experienced Parental/Caregiver Loss                      | 1.48     | 1.45,1.52    | 1.47     | 1.43,1.51    | 1.29     | 1.26,1.33 | 1.25     | 1.21,1.28   | 1.00     | 1.002,1.008     | 1.001    | 0.998,1.004     | 1.002    | 0.999,1.006   | 0.99     | 0.98,0.99     |
| Age (Years)                                              | 1.04     | 1.0436,1.044 | 1.03     | 1.026,1.0264 | 1.03     | 1.03,1.03 | 1.03     | 1.034,1.035 | 1.0148   | 1.01479,1.01481 | 1.01     | 1.01412,1.01414 | 1.014    | 1.014,1.0141  | 1.01     | 1.0125,1.0126 |
| Gender (Male vs Female)                                  | 2.20     | 2.16,2.23    | 2.05     | 2.01,2.09    | 2.01     | 1.98,2.04 | 2.02     | 1.99,2.06   | 1.003    | 1.003,1.004     | 0.999    | 0.9985,0.999    | 0.999    | 0.998,0.999   | 0.995    | 0.9947,0.9953 |
| Parental Education (Higher Values = Higher Education)    |          |              | 0.58     | 0.57,0.58    | 0.65     | 0.64,0.65 | 0.68     | 0.678,0.685 |          |                 | 0.97     | 0.968,0.969     | 0.968    | 0.968,0.968   | 0.991    | 0.9912,0.9917 |
| Race/Ethnicity: NH-Black                                 |          |              |          |              | 4.03     | 3.88,4.18 | 3.70     | 3.56,3.84   |          |                 |          |                 | 0.994    | 0.992,0.995   | 0.95     | 0.9468,0.9509 |
| Hispanic                                                 |          |              |          |              | 3.16     | 2.95,3.38 | 3.11     | 2.9,3.32    |          |                 |          |                 | 0.9996   | 0.996,1.003   | 0.994    | 0.9905,0.9981 |
| Other Race                                               |          |              |          |              | 3.94     | 3.55,4.38 | 4.00     | 3.59,4.46   |          |                 |          |                 | 0.941    | 0.939,0.943   | 0.94     | 0.9365,0.9435 |
| Participant Education (Higher Values = Higher Education) |          |              |          |              |          |           | 0.82     | 0.82,0.83   |          |                 |          |                 |          |               | 0.961    | 0.9604,0.9609 |
| Smoking Status                                           |          |              |          |              |          |           | 1.11     | 1.1,1.12    |          |                 |          |                 |          |               | 1.0036   | 1.0032,1.004  |
| Change in Self-Reported Health                           |          |              |          |              |          |           | 0.99     | 0.98,0.99   |          |                 |          |                 |          |               | 0.995    | 0.9947,0.9951 |
| Self-Report of Health Change                             |          |              |          |              |          |           | 0.89     | 0.88,0.9    |          |                 |          |                 |          |               | 1.0206   | 1.0203,1.021  |
| Chronic Condition Index                                  |          |              |          |              |          |           | 1.03     | 1.02,1.03   |          |                 |          |                 |          |               | 1.0563   | 1.0561,1.0566 |
| Change in Functional Limitations                         |          |              |          |              |          |           | 0.87     | 0.86,0.88   |          |                 |          |                 |          |               | 1.0367   | 1.0362,1.0372 |
| BMI                                                      |          |              |          |              |          |           | 1.01     | 1.004,1.007 |          |                 |          |                 |          |               | 1.012    | 1.0114,1.0117 |

  

|                                                          | IL-6     |               |          |                |          |             |          |                | CRP      |               |          |             |          |             |          |             |
|----------------------------------------------------------|----------|---------------|----------|----------------|----------|-------------|----------|----------------|----------|---------------|----------|-------------|----------|-------------|----------|-------------|
|                                                          | Model 1  |               | Model 2  |                | Model 3  |             | Model 4  |                | Model 1  |               | Model 2  |             | Model 3  |             | Model 4  |             |
|                                                          | Estimate | CI            | Estimate | CI             | Estimate | CI          | Estimate | CI             | Estimate | CI            | Estimate | CI          | Estimate | CI          | Estimate | CI          |
| Intercept                                                | 1.35     | 1.33,1.38     | 1.60     | 1.55,1.65      | 1.44     | 1.39,1.5    | 0.56     | 0.53,0.6       | 1.84     | 1.78,1.9      | 2.40     | 2.29,2.5    | 2.19     | 2.08,2.3    | 0.27     | 0.25,0.3    |
| Experienced Parental/Caregiver Loss                      | 1.05     | 1.04,1.06     | 1.05     | 1.04,1.06      | 1.04     | 1.03,1.04   | 1.01     | 0.998,1.013    | 1.07     | 1.06,1.08     | 1.07     | 1.06,1.08   | 1.05     | 1.04,1.06   | 1.014    | 1.01,1.02   |
| Age (Years)                                              | 1.02     | 1.0172,1.0173 | 1.02     | 1.0167,1.01672 | 1.02     | 1.017,1.018 | 1.02     | 1.018,1.018    | 0.9995   | 0.9994,0.9995 | 1.00     | 0.998,0.998 | 0.9985   | 0.998,0.999 | 1.0016   | 1.001,1.002 |
| Gender (Male vs Female)                                  | 0.957    | 0.956,0.959   | 0.95     | 0.95,0.952     | 0.95     | 0.947,0.95  | 0.955    | 0.95,0.96      | 1.20     | 1.197,1.202   | 1.20     | 1.197,1.203 | 1.196    | 1.19,1.2    | 1.21     | 1.206,1.211 |
| Parental Education (Higher Values = Higher Education)    |          |               | 0.94     | 0.937,0.938    | 0.95     | 0.949,0.95  | 0.987    | 0.987,0.988    |          |               | 0.92     | 0.918,0.919 | 0.93     | 0.929,0.93  | 0.98     | 0.977,0.978 |
| Race/Ethnicity: NH-Black                                 |          |               |          |                | 1.20     | 1.19,1.21   | 1.108    | 1.1005,1.11597 |          |               |          |             | 1.22     | 1.201,1.235 | 1.09     | 1.07,1.1    |
| Hispanic                                                 |          |               |          |                | 1.14     | 1.12,1.15   | 1.113    | 1.1005,1.12532 |          |               |          |             | 1.115    | 1.095,1.136 | 1.11     | 1.09,1.12   |
| Other Race                                               |          |               |          |                | 1.06     | 1.04,1.09   | 1.081    | 1.0611,1.10147 |          |               |          |             | 0.98     | 0.962,1.002 | 1.01     | 0.99,1.03   |
| Participant Education (Higher Values = Higher Education) |          |               |          |                |          |             | 0.94     | 0.943,0.945    |          |               |          |             |          |             | 0.95     | 0.95,0.953  |
| Smoking Status                                           |          |               |          |                |          |             | 1.08     | 1.077,1.08     |          |               |          |             |          |             | 1.12     | 1.12,1.13   |
| Change in Self-Reported Health                           |          |               |          |                |          |             | 1.01     | 1.011,1.012    |          |               |          |             |          |             | 0.99     | 0.99,0.992  |
| Self-Report of Health Change                             |          |               |          |                |          |             | 1.00     | 1.003,1.006    |          |               |          |             |          |             | 1.06     | 1.06,1.065  |
| Chronic Condition Index                                  |          |               |          |                |          |             | 1.07     | 1.065,1.066    |          |               |          |             |          |             | 1.06     | 1.055,1.057 |
| Change in Functional Limitations                         |          |               |          |                |          |             | 1.03     | 1.025,1.029    |          |               |          |             |          |             | 1.06     | 1.059,1.064 |
| BMI                                                      |          |               |          |                |          |             | 1.03     | 1.027,1.028    |          |               |          |             |          |             | 1.054    | 1.053,1.055 |
