# Supplementary material for: Biological expressions of early life trauma in the immune system of older adults
Source: PubMed Central journal article supplement (PMC10284407; doi:10.1371/journal.pone.0286141), 2023-06-21
Supplement: pone.0286141.s007.pdf [file pone.0286141.s007.pdf]

### Section 3: Interaction Analyses and Stratified Analyses

**S3 Table.** Results of the regression analysis assessing two-way interactions between both experiencing parental/caregiver loss and race/ethnicity; and experiencing parental separation and race/ethnicity for four immune health indicators.

|                                                               | <b>CMV<br/>P Value</b> | <b>CRP<br/>P Value</b> | <b>sTNF<br/>P Value</b> | <b>IL-6<br/>P Value</b> |
|---------------------------------------------------------------|------------------------|------------------------|-------------------------|-------------------------|
| <b>Experiencing Parental/Caregiver Loss*Race Interactions</b> |                        |                        |                         |                         |
| Experiencing Parental/Caregiver Loss*Non-Hispanic Black       | 0.40                   | 0.16                   | 0.44                    | 0.02                    |
| Experiencing Parental/Caregiver Loss*Hispanic                 | 0.50                   | 0.95                   | 0.14                    | 0.84                    |
| Experiencing Parental/Caregiver Loss*Other Race               | 0.43                   | 0.09                   | 0.73                    | 0.45                    |
| <b>Experiencing Parental Separation*Race Interactions</b>     |                        |                        |                         |                         |
| Experiencing Parental Separation*Non-Hispanic Black           | 0.99                   | 0.10                   | 0.80                    | 0.03                    |
| Experiencing Parental Separation*Hispanic                     | 0.53                   | 0.37                   | 0.66                    | 0.08                    |
| Experiencing Parental Separation*Other Race                   | 0.99                   | 0.63                   | 0.76                    | 0.09                    |
