# Supplementary material for: Biological expressions of early life trauma in the immune system of older adults
Source: PubMed Central journal article supplement (PMC10284407; doi:10.1371/journal.pone.0286141), 2023-06-21
Supplement: pone.0286141.s008.pdf [file pone.0286141.s008.pdf]

**S4 Table.** Exponentiated regression coefficients estimating the association between experiencing parental/caregiver loss before the age of 16 years and CMV (Panel A), sTNFR (Panel B), IL-6 (Panel C), and CRP (Panel D) stratified by race/ethnicity. **Model 1** controls for age at the baseline interview in 2016 and gender. **Model 2** includes additional controls for parental education. **Model 3** includes additional controls for participant education, smoking status, change in self-reported health, self-report of a change in health status, chronic conditions index, change in functional limitations, and BMI.

**Panel A. CMV**

|                                                                 | <b>Non-Hispanic Black</b> |              |                |              |                |                  |
|-----------------------------------------------------------------|---------------------------|--------------|----------------|--------------|----------------|------------------|
|                                                                 | <b>Model 1</b>            |              | <b>Model 2</b> |              | <b>Model 3</b> |                  |
|                                                                 | <b>Est</b>                | <b>CI</b>    | <b>Est</b>     | <b>CI</b>    | <b>Est</b>     | <b>CI</b>        |
| <b>Intercept</b>                                                | 21.26                     | 7.64,59.2    | 99.17          | 21.09,466.26 | 220.74         | 19.56,2491.27    |
| <b>Experienced Parental/Caregiver Loss</b>                      | 1.33                      | 1.26,1.41    | 1.26           | 1.17,1.34    | 1.21           | 1.13,1.29        |
| <b>Age (Years)</b>                                              | 1.01                      | 1.007,1.013  | 0.99           | 0.992,0.997  | 0.99           | 0.991,0.997      |
| <b>Gender (Male vs Female)</b>                                  | 2.26                      | 2.08,2.44    | 2.16           | 1.98,2.36    | 2.44           | 2.23,2.67        |
| <b>Parental Education (Higher Values = Higher Education)</b>    |                           |              | 0.72           | 0.69,0.74    | 0.71           | 0.69,0.73        |
| <b>Participant Education (Higher Values = Higher Education)</b> |                           |              |                |              | 0.89           | 0.87,0.92        |
| <b>Smoking Status</b>                                           |                           |              |                |              | 1.12           | 1.09,1.16        |
| <b>Change in Self-Reported Health</b>                           |                           |              |                |              | 1.00           | 0.98,1.02        |
| <b>Self-Report of Health Change</b>                             |                           |              |                |              | 0.99           | 0.95,1.03        |
| <b>Chronic Condition Index</b>                                  |                           |              |                |              | 0.91           | 0.88,0.93        |
| <b>Change in Functional Limitations</b>                         |                           |              |                |              | 1.09           | 1.06,1.11        |
| <b>BMI</b>                                                      |                           |              |                |              | 0.98           | 0.98,0.99        |
|                                                                 |                           |              |                |              |                |                  |
|                                                                 | <b>Hispanic</b>           |              |                |              |                |                  |
|                                                                 | <b>Model 1</b>            |              | <b>Model 2</b> |              | <b>Model 3</b> |                  |
|                                                                 | <b>Est</b>                | <b>CI</b>    | <b>Est</b>     | <b>CI</b>    | <b>Est</b>     | <b>CI</b>        |
| <b>Intercept</b>                                                | 2.56                      | 0.04,153.14  | 10.05          | 0.15,690.54  | 403.77         | 1.21,135233.81   |
| <b>Experienced Parental/Caregiver Loss</b>                      | 1.01                      | 0.87,1.17    | 0.89           | 0.75,1.05    | 0.88           | 0.75,1.03        |
| <b>Age (Years)</b>                                              | 1.06                      | 1.05,1.06    | 1.04           | 1.04,1.04    | 1.03           | 1.02,1.03        |
| <b>Gender (Male vs Female)</b>                                  | 1.06                      | 0.85,1.3     | 1.12           | 0.92,1.36    | 1.01           | 0.84,1.21        |
| <b>Parental Education (Higher Values = Higher Education)</b>    |                           |              | 0.62           | 0.58,0.66    | 0.68           | 0.63,0.73        |
| <b>Participant Education (Higher Values = Higher Education)</b> |                           |              |                |              | 0.88           | 0.84,0.91        |
| <b>Smoking Status</b>                                           |                           |              |                |              | 0.68           | 0.59,0.79        |
| <b>Change in Self-Reported Health</b>                           |                           |              |                |              | 0.89           | 0.83,0.94        |
| <b>Self-Report of Health Change</b>                             |                           |              |                |              | 0.58           | 0.50,0.67        |
| <b>Chronic Condition Index</b>                                  |                           |              |                |              | 1.16           | 1.13,1.19        |
| <b>Change in Functional Limitations</b>                         |                           |              |                |              | 0.82           | 0.77,0.87        |
| <b>BMI</b>                                                      |                           |              |                |              | 0.82           | 0.77,0.87        |
|                                                                 |                           |              |                |              |                |                  |
|                                                                 | <b>Other Race</b>         |              |                |              |                |                  |
|                                                                 | <b>Model 1</b>            |              | <b>Model 2</b> |              | <b>Model 3</b> |                  |
|                                                                 | <b>Est</b>                | <b>CI</b>    | <b>Est</b>     | <b>CI</b>    | <b>Est</b>     | <b>CI</b>        |
| <b>Intercept</b>                                                | 8.06                      | 0.01,5051.07 | 10.48          | 0.,621056.12 | 1.71           | 0.,1254949545.22 |
| <b>Experienced Parental/Caregiver Loss</b>                      | 1.13                      | 0.85,1.49    | 0.87           | 0.61,1.24    | 0.86           | 0.58,1.28        |
| <b>Age (Years)</b>                                              | 1.04                      | 1.03,1.04    | 1.04           | 1.03,1.04    | 1.03           | 1.026,1.035      |
| <b>Gender (Male vs Female)</b>                                  | 1.18                      | 0.84,1.64    | 1.16           | 0.78,1.74    | 1.26           | 0.83,1.92        |
| <b>Parental Education (Higher Values = Higher Education)</b>    |                           |              | 0.83           | 0.76,0.9     | 0.87           | 0.80,0.94        |
| <b>Participant Education (Higher Values = Higher Education)</b> |                           |              |                |              | 1.15           | 1.01,1.31        |
| <b>Smoking Status</b>                                           |                           |              |                |              | 1.03           | 0.73,1.44        |
| <b>Change in Self-Reported Health</b>                           |                           |              |                |              | 0.83           | 0.71,0.97        |
| <b>Self-Report of Health Change</b>                             |                           |              |                |              | 1.70           | 1.29,2.24        |
| <b>Chronic Condition Index</b>                                  |                           |              |                |              | 1.07           | 1.02,1.13        |
| <b>Change in Functional Limitations</b>                         |                           |              |                |              | 1.17           | 0.82,1.67        |
| <b>BMI</b>                                                      |                           |              |                |              | 1.00           | 0.993,1.003      |
|                                                                 |                           |              |                |              |                |                  |
|                                                                 | <b>Non-Hispanic White</b> |              |                |              |                |                  |
|                                                                 | <b>Model 1</b>            |              | <b>Model 2</b> |              | <b>Model 3</b> |                  |
|                                                                 | <b>Est</b>                | <b>CI</b>    | <b>Est</b>     | <b>CI</b>    | <b>Est</b>     | <b>CI</b>        |
| <b>Intercept</b>                                                | 0.23                      | 0.16,0.32    | 1.58           | 0.98,2.54    | 2.10           | 0.77,5.73        |
| <b>Experienced Parental/Caregiver Loss</b>                      | 1.13                      | 1.09,1.17    | 1.03           | 0.99,1.07    | 0.97           | 0.93,1.01        |
| <b>Age (Years)</b>                                              | 1.05                      | 1.05,1.05    | 1.04           | 1.037,1.038  | 1.04           | 1.038,1.039      |
| <b>Gender (Male vs Female)</b>                                  | 2.21                      | 2.16,2.26    | 2.09           | 2.04,2.14    | 2.11           | 2.07,2.16        |
| <b>Parental Education (Higher Values = Higher Education)</b>    |                           |              | 0.63           | 0.63,0.64    | 0.68           | 0.67,0.68        |
| <b>Participant Education (Higher Values = Higher Education)</b> |                           |              |                |              | 0.78           | 0.77,0.79        |
| <b>Smoking Status</b>                                           |                           |              |                |              | 1.14           | 1.13,1.16        |
| <b>Change in Self-Reported Health</b>                           |                           |              |                |              | 1.00           | 0.99,1.01        |
| <b>Self-Report of Health Change</b>                             |                           |              |                |              | 0.90           | 0.88,0.92        |
| <b>Chronic Condition Index</b>                                  |                           |              |                |              | 1.04           | 1.03,1.04        |
| <b>Change in Functional Limitations</b>                         |                           |              |                |              | 0.82           | 0.81,0.84        |
| <b>BMI</b>                                                      |                           |              |                |              | 1.01           | 1.008,1.011      |

**Panel B. sTNFR**

|                                                          | Non-Hispanic Black<br>sTNFR |                |         |                |         |                 |
|----------------------------------------------------------|-----------------------------|----------------|---------|----------------|---------|-----------------|
|                                                          | Model 1                     |                | Model 2 |                | Model 3 |                 |
|                                                          | Est                         | CI             | Est     | CI             | Est     | CI              |
| Intercept                                                | 673.81                      | 637.44,712.26  | 678.66  | 605.48,760.68  | 471.02  | 413.14,537.02   |
| Experienced Parental/Caregiver Loss                      | 1.02                        | 1.,1.03        | 1.01    | 0.99,1.03      | 1.00    | 0.98,1.01       |
| Age (Years)                                              | 1.01                        | 1.0129,1.0131  | 1.01    | 1.0139,1.0141  | 1.01    | 1.011,1.012     |
| Gender (Male vs Female)                                  | 1.01                        | 1.01,1.02      | 0.99    | 0.988,0.9976   | 0.97    | 0.97,0.98       |
| Parental Education (Higher Values = Higher Education)    |                             |                | 0.98    | 0.98,0.98      | 1.00    | 0.997,1.002     |
| Participant Education (Higher Values = Higher Education) |                             |                |         |                | 0.98    | 0.98,0.98       |
| Smoking Status                                           |                             |                |         |                | 1.02    | 1.01,1.02       |
| Change in Self-Reported Health                           |                             |                |         |                | 0.99    | 0.988,0.99      |
| Self-Report of Health Change                             |                             |                |         |                | 1.03    | 1.02,1.03       |
| Chronic Condition Index                                  |                             |                |         |                | 1.08    | 1.079,1.082     |
| Change in Functional Limitations                         |                             |                |         |                | 1.08    | 1.08,1.09       |
| BMI                                                      |                             |                |         |                | 1.01    | 1.008,1.009     |
|                                                          | Hispanic<br>sTNFR           |                |         |                |         |                 |
|                                                          | Model 1                     |                | Model 2 |                | Model 3 |                 |
|                                                          | Est                         | CI             | Est     | CI             | Est     | CI              |
| Intercept                                                | 896.61                      | 778.53,1032.61 | 926.66  | 731.26,1174.28 | 852.05  | 538.85,1347.31  |
| Experienced Parental/Caregiver Loss                      | 0.98                        | 0.97,0.99      | 0.98    | 0.96,0.99      | 0.95    | 0.93,0.96       |
| Age (Years)                                              | 1.01                        | 1.01,1.0104    | 1.01    | 1.0098,1.0101  | 1.01    | 1.006,1.007     |
| Gender (Male vs Female)                                  | 0.97                        | 0.95,0.98      | 0.97    | 0.954,0.978    | 0.93    | 0.92,0.94       |
| Parental Education (Higher Values = Higher Education)    |                             |                | 0.98    | 0.97,0.98      | 1.01    | 1.01,1.02       |
| Participant Education (Higher Values = Higher Education) |                             |                |         |                | 0.96    | 0.95,0.97       |
| Smoking Status                                           |                             |                |         |                | 1.06    | 1.06,1.07       |
| Change in Self-Reported Health                           |                             |                |         |                | 0.94    | 0.94,0.95       |
| Self-Report of Health Change                             |                             |                |         |                | 1.06    | 1.04,1.07       |
| Chronic Condition Index                                  |                             |                |         |                | 1.09    | 1.089,1.094     |
| Change in Functional Limitations                         |                             |                |         |                | 1.04    | 1.04,1.05       |
| BMI                                                      |                             |                |         |                | 1.00    | 1.001,1.002     |
|                                                          | Other Race<br>sTNFR         |                |         |                |         |                 |
|                                                          | Model 1                     |                | Model 2 |                | Model 3 |                 |
|                                                          | Est                         | CI             | Est     | CI             | Est     | CI              |
| Intercept                                                | 452.59                      | 406.57,503.83  | 531.87  | 461.44,613.06  | 464.14  | 309.11,696.91   |
| Experienced Parental/Caregiver Loss                      | 1.03                        | 1.01,1.05      | 1.01    | 0.99,1.03      | 0.97    | 0.95,0.99       |
| Age (Years)                                              | 1.02                        | 1.0175,1.0181  | 1.02    | 1.015,1.016    | 1.01    | 1.013,1.014     |
| Gender (Male vs Female)                                  | 1.04                        | 1.03,1.05      | 1.07    | 1.06,1.07      | 0.99    | 0.977,0.995     |
| Parental Education (Higher Values = Higher Education)    |                             |                | 0.96    | 0.95,0.96      | 0.99    | 0.99,0.996      |
| Participant Education (Higher Values = Higher Education) |                             |                |         |                | 0.94    | 0.94,0.95       |
| Smoking Status                                           |                             |                |         |                | 0.94    | 0.93,0.94       |
| Change in Self-Reported Health                           |                             |                |         |                | 1.00    | 0.995,1.002     |
| Self-Report of Health Change                             |                             |                |         |                | 1.03    | 1.02,1.04       |
| Chronic Condition Index                                  |                             |                |         |                | 1.07    | 1.069,1.074     |
| Change in Functional Limitations                         |                             |                |         |                | 1.09    | 1.08,1.1        |
| BMI                                                      |                             |                |         |                | 1.01    | 1.007,1.011     |
|                                                          | Non-Hispanic White<br>sTNFR |                |         |                |         |                 |
|                                                          | Model 1                     |                | Model 2 |                | Model 3 |                 |
|                                                          | Est                         | CI             | Est     | CI             | Est     | CI              |
| Intercept                                                | 611.73                      | 608.43,615.05  | 688.88  | 684.69,693.11  | 465.42  | 459.37,471.56   |
| Experienced Parental/Caregiver Loss                      | 1.04                        | 1.04,1.05      | 1.04    | 1.03,1.04      | 1.02    | 1.02,1.03       |
| Age (Years)                                              | 1.01                        | 1.01488,1.0149 | 1.01    | 1.0141,1.0141  | 1.01    | 1.01286,1.01293 |
| Gender (Male vs Female)                                  | 1.00                        | 1.004,1.005    | 1.00    | 0.9998,1.0006  | 1.00    | 1.001,1.002     |
| Parental Education (Higher Values = Higher Education)    |                             |                | 0.97    | 0.968,0.968    | 0.99    | 0.989,0.99      |
| Participant Education (Higher Values = Higher Education) |                             |                |         |                | 0.96    | 0.961,0.962     |
| Smoking Status                                           |                             |                |         |                | 1.00    | 0.999,0.9997    |
| Change in Self-Reported Health                           |                             |                |         |                | 1.00    | 0.999,0.9996    |
| Self-Report of Health Change                             |                             |                |         |                | 1.02    | 1.018,1.0187    |
| Chronic Condition Index                                  |                             |                |         |                | 1.05    | 1.051,1.0517    |
| Change in Functional Limitations                         |                             |                |         |                | 1.02    | 1.022,1.023     |
| BMI                                                      |                             |                |         |                | 1.01    | 1.012,1.0128    |

**Panel C. IL-6**

|                                                          | Non-Hispanic Black |           |              |           |         |           |
|----------------------------------------------------------|--------------------|-----------|--------------|-----------|---------|-----------|
|                                                          | Model 1            |           | IL-6 Model 2 |           | Model 3 |           |
|                                                          | Est                | CI        | Est          | CI        | Est     | CI        |
| Intercept                                                | 1.37               | 1.16,1.62 | 1.11         | 0.88,1.39 | 0.47    | 0.31,0.72 |
| Experienced Parental/Caregiver Loss                      | 0.99               | 0.97,1.01 | 0.96         | 0.95,0.98 | 0.95    | 0.93,0.97 |
| Age (Years)                                              | 1.01               | 1.01,1.02 | 1.02         | 1.02,1.02 | 1.02    | 1.02,1.02 |
| Gender (Male vs Female)                                  | 1.17               | 1.15,1.19 | 1.15         | 1.13,1.17 | 1.13    | 1.11,1.15 |
| Parental Education (Higher Values = Higher Education)    |                    |           | 0.95         | 0.95,0.96 | 0.96    | 0.95,0.96 |
| Participant Education (Higher Values = Higher Education) |                    |           |              |           | 1.03    | 1.03,1.04 |
| Smoking Status                                           |                    |           |              |           | 1.13    | 1.12,1.14 |
| Change in Self-Reported Health                           |                    |           |              |           | 1.08    | 1.08,1.08 |
| Self-Report of Health Change                             |                    |           |              |           | 0.97    | 0.96,0.98 |
| Chronic Condition Index                                  |                    |           |              |           | 1.04    | 1.03,1.04 |
| Change in Functional Limitations                         |                    |           |              |           | 0.99    | 0.99,1.   |
| BMI                                                      |                    |           |              |           | 1.02    | 1.01,1.02 |
|                                                          | Hispanic           |           |              |           |         |           |
|                                                          | Model 1            |           | IL-6 Model 2 |           | Model 3 |           |
|                                                          | Est                | CI        | Est          | CI        | Est     | CI        |
| Intercept                                                | 0.37               | 0.18,0.74 | 0.28         | 0.12,0.65 | 0.15    | 0.04,0.59 |
| Experienced Parental/Caregiver Loss                      | 1.00               | 0.96,1.05 | 1.04         | 0.99,1.1  | 1.01    | 0.96,1.05 |
| Age (Years)                                              | 1.03               | 1.03,1.03 | 1.04         | 1.04,1.04 | 1.04    | 1.03,1.04 |
| Gender (Male vs Female)                                  | 1.21               | 1.18,1.24 | 1.23         | 1.19,1.27 | 1.18    | 1.14,1.21 |
| Parental Education (Higher Values = Higher Education)    |                    |           | 1.04         | 1.03,1.05 | 1.08    | 1.07,1.09 |
| Participant Education (Higher Values = Higher Education) |                    |           |              |           | 0.92    | 0.91,0.93 |
| Smoking Status                                           |                    |           |              |           | 1.09    | 1.06,1.13 |
| Change in Self-Reported Health                           |                    |           |              |           | 1.03    | 1.02,1.05 |
| Self-Report of Health Change                             |                    |           |              |           | 1.10    | 1.07,1.13 |
| Chronic Condition Index                                  |                    |           |              |           | 1.04    | 1.03,1.05 |
| Change in Functional Limitations                         |                    |           |              |           | 1.05    | 1.04,1.07 |
| BMI                                                      |                    |           |              |           | 1.02    | 1.02,1.02 |
|                                                          | Other Race         |           |              |           |         |           |
|                                                          | Model 1            |           | IL-6 Model 2 |           | Model 3 |           |
|                                                          | Est                | CI        | Est          | CI        | Est     | CI        |
| Intercept                                                | 1.30               | 0.69,2.45 | 2.41         | 1.11,5.24 | 0.59    | 0.11,3.12 |
| Experienced Parental/Caregiver Loss                      | 0.96               | 0.91,1.01 | 0.98         | 0.92,1.04 | 0.90    | 0.86,0.94 |
| Age (Years)                                              | 1.01               | 1.01,1.02 | 1.01         | 1.01,1.01 | 1.00    | 1.,1.01   |
| Gender (Male vs Female)                                  | 1.11               | 1.04,1.19 | 1.07         | 0.99,1.16 | 0.89    | 0.86,0.92 |
| Parental Education (Higher Values = Higher Education)    |                    |           | 0.94         | 0.93,0.96 | 1.11    | 1.07,1.14 |
| Participant Education (Higher Values = Higher Education) |                    |           |              |           | 0.74    | 0.70,0.79 |
| Smoking Status                                           |                    |           |              |           | 0.87    | 0.84,0.9  |
| Change in Self-Reported Health                           |                    |           |              |           | 0.87    | 0.83,0.9  |
| Self-Report of Health Change                             |                    |           |              |           | 1.24    | 1.12,1.37 |
| Chronic Condition Index                                  |                    |           |              |           | 1.08    | 1.08,1.09 |
| Change in Functional Limitations                         |                    |           |              |           | 1.04    | 1.,1.07   |
| BMI                                                      |                    |           |              |           | 1.06    | 1.05,1.06 |
|                                                          | Non-Hispanic White |           |              |           |         |           |
|                                                          | Model 1            |           | IL-6 Model 2 |           | Model 3 |           |
|                                                          | Est                | CI        | Est          | CI        | Est     | CI        |
| Intercept                                                | 1.43               | 1.39,1.47 | 1.66         | 1.59,1.73 | 0.65    | 0.6,0.7   |
| Experienced Parental/Caregiver Loss                      | 1.10               | 1.09,1.11 | 1.09         | 1.08,1.1  | 1.05    | 1.04,1.06 |
| Age (Years)                                              | 1.02               | 1.02,1.02 | 1.02         | 1.02,1.02 | 1.02    | 1.02,1.02 |
| Gender (Male vs Female)                                  | 0.92               | 0.92,0.92 | 0.92         | 0.92,0.92 | 0.93    | 0.93,0.93 |
| Parental Education (Higher Values = Higher Education)    |                    |           | 0.95         | 0.95,0.95 | 0.98    | 0.98,0.98 |
| Participant Education (Higher Values = Higher Education) |                    |           |              |           | 0.95    | 0.95,0.95 |
| Smoking Status                                           |                    |           |              |           | 1.07    | 1.07,1.08 |
| Change in Self-Reported Health                           |                    |           |              |           | 1.01    | 1.01,1.01 |
| Self-Report of Health Change                             |                    |           |              |           | 0.99    | 0.99,1.   |
| Chronic Condition Index                                  |                    |           |              |           | 1.07    | 1.07,1.07 |
| Change in Functional Limitations                         |                    |           |              |           | 1.04    | 1.04,1.04 |
| BMI                                                      |                    |           |              |           | 1.03    | 1.03,1.03 |

## Panel D. CRP

| Non-Hispanic Black                                       |         |             |             |               |         |              |
|----------------------------------------------------------|---------|-------------|-------------|---------------|---------|--------------|
|                                                          | Model 1 |             | CRP Model 2 |               | Model 3 |              |
|                                                          | Est     | CI          | Est         | CI            | Est     | CI           |
| Intercept                                                | 1.66    | 1.01,2.73   | 2.06        | 1.15,3.69     | 0.23    | 0.09,0.58    |
| Experienced Parental/Caregiver Loss                      | 1.00    | 0.97,1.04   | 0.98        | 0.94,1.02     | 0.98    | 0.94,1.02    |
| Age (Years)                                              | 1.00    | 0.999,1.001 | 1.00        | 0.998,1.00001 | 1.01    | 1.005,1.007  |
| Gender (Male vs Female)                                  | 1.44    | 1.4,1.47    | 1.45        | 1.41,1.49     | 1.33    | 1.3,1.37     |
| Parental Education (Higher Values = Higher Education)    |         |             | 0.87        | 0.85,0.88     | 0.89    | 0.88,0.9     |
| Participant Education (Higher Values = Higher Education) |         |             |             |               | 1.02    | 1.01,1.03    |
| Smoking Status                                           |         |             |             |               | 1.16    | 1.14,1.17    |
| Change in Self-Reported Health                           |         |             |             |               | 1.06    | 1.05,1.07    |
| Self-Report of Health Change                             |         |             |             |               | 0.97    | 0.95,0.99    |
| Chronic Condition Index                                  |         |             |             |               | 1.08    | 1.08,1.09    |
| Change in Functional Limitations                         |         |             |             |               | 1.08    | 1.07,1.09    |
| BMI                                                      |         |             |             |               | 1.05    | 1.05,1.053   |
|                                                          |         |             |             |               |         | ***          |
| Hispanic                                                 |         |             |             |               |         |              |
|                                                          | Model 1 |             | CRP Model 2 |               | Model 3 |              |
|                                                          | Est     | CI          | Est         | CI            | Est     | CI           |
| Intercept                                                | 1.02    | 0.54,1.93   | 0.82        | 0.39,1.73     | 0.11    | 0.02,0.52    |
| Experienced Parental/Caregiver Loss                      | 1.03    | 1.001,1.056 | 1.06        | 1.03,1.09     | 1.02    | 0.997,1.049  |
| Age (Years)                                              | 1.01    | 1.005,1.008 | 1.01        | 1.008,1.01    | 1.01    | 1.01,1.02    |
| Gender (Male vs Female)                                  | 1.37    | 1.31,1.44   | 1.42        | 1.35,1.49     | 1.30    | 1.24,1.36    |
| Parental Education (Higher Values = Higher Education)    |         |             | 1.05        | 1.02,1.07     | 1.10    | 1.08,1.13    |
| Participant Education (Higher Values = Higher Education) |         |             |             |               | 0.91    | 0.89,0.92    |
| Smoking Status                                           |         |             |             |               | 1.09    | 1.06,1.13    |
| Change in Self-Reported Health                           |         |             |             |               | 1.02    | 1.01,1.03    |
| Self-Report of Health Change                             |         |             |             |               | 1.20    | 1.17,1.24    |
| Chronic Condition Index                                  |         |             |             |               | 0.98    | 0.97,0.99    |
| Change in Functional Limitations                         |         |             |             |               | 1.13    | 1.12,1.14    |
| BMI                                                      |         |             |             |               | 1.05    | 1.045,1.049  |
| Other Race                                               |         |             |             |               |         |              |
|                                                          | Model 1 |             | CRP Model 2 |               | Model 3 |              |
|                                                          | Est     | CI          | Est         | CI            | Est     | CI           |
| Intercept                                                | 2.39    | 0.46,12.38  | 6.57        | 0.86,50.44    | 1.17    | 0.041,33.137 |
| Experienced Parental/Caregiver Loss                      | 0.89    | 0.83,0.94   | 0.86        | 0.82,0.92     | 0.80    | 0.763,0.846  |
| Age (Years)                                              | 1.00    | 0.996,0.999 | 0.99        | 0.986,0.989   | 1.00    | 0.996,0.999  |
| Gender (Male vs Female)                                  | 1.05    | 0.986,1.111 | 0.97        | 0.91,1.04     | 0.87    | 0.818,0.929  |
| Parental Education (Higher Values = Higher Education)    |         |             | 0.85        | 0.84,0.86     | 0.89    | 0.877,0.901  |
| Participant Education (Higher Values = Higher Education) |         |             |             |               | 1.08    | 1.039,1.112  |
| Smoking Status                                           |         |             |             |               | 0.98    | 0.945,1.009  |
| Change in Self-Reported Health                           |         |             |             |               | 1.23    | 1.202,1.257  |
| Self-Report of Health Change                             |         |             |             |               | 0.79    | 0.76,0.823   |
| Chronic Condition Index                                  |         |             |             |               | 1.10    | 1.085,1.108  |
| Change in Functional Limitations                         |         |             |             |               | 1.32    | 1.26,1.38    |
| BMI                                                      |         |             |             |               | 1.05    | 1.05,1.06    |
| Non-Hispanic White                                       |         |             |             |               |         |              |
|                                                          | Model 1 |             | CRP Model 2 |               | Model 3 |              |
|                                                          | Est     | CI          | Est         | CI            | Est     | CI           |
| Intercept                                                | 1.91    | 1.83,1.99   | 2.33        | 2.2,2.47      | 0.28    | 0.25,0.32    |
| Experienced Parental/Caregiver Loss                      | 1.12    | 1.11,1.14   | 1.11        | 1.096,1.124   | 1.06    | 1.04,1.07    |
| Age (Years)                                              | 1.00    | 0.999,1.    | 1.00        | 0.998,0.998   | 1.00    | 1.001,1.001  |
| Gender (Male vs Female)                                  | 1.17    | 1.17,1.18   | 1.18        | 1.17,1.18     | 1.21    | 1.2,1.21     |
| Parental Education (Higher Values = Higher Education)    |         |             | 0.94        | 0.94,0.94     | 0.99    | 0.98,0.99    |
| Participant Education (Higher Values = Higher Education) |         |             |             |               | 0.94    | 0.938,0.942  |
| Smoking Status                                           |         |             |             |               | 1.12    | 1.118,1.123  |
| Change in Self-Reported Health                           |         |             |             |               | 0.97    | 0.97,0.98    |
| Self-Report of Health Change                             |         |             |             |               | 1.08    | 1.076,1.082  |
| Chronic Condition Index                                  |         |             |             |               | 1.06    | 1.055,1.057  |
| Change in Functional Limitations                         |         |             |             |               | 1.05    | 1.046,1.051  |
| BMI                                                      |         |             |             |               | 1.05    | 1.054,1.055  |
