# Supplementary material for: Biological expressions of early life trauma in the immune system of older adults
Source: PubMed Central journal article supplement (PMC10284407; doi:10.1371/journal.pone.0286141), 2023-06-21
Supplement: pone.0286141.s009.pdf [file pone.0286141.s009.pdf]

**S5 Table.** Exponentiated regression coefficients estimating the association between experiencing parental separation before the age of 16 years and CMV (Panel A), sTNFR (Panel B), IL-6 (Panel C), and CRP (Panel D) stratified by race/ethnicity. **Model 1** controls for age at the baseline interview in 2016 and gender. **Model 2** includes additional controls for parental education. **Model 3** includes additional controls for participant education, smoking status, change in self-reported health, self-report of a chance in health status, chronic conditions index, change in functional limitations and BMI.

**Panel A. CMV**

|                                                          | Non-Hispanic Black<br>CMV |              |         |              |         |                |
|----------------------------------------------------------|---------------------------|--------------|---------|--------------|---------|----------------|
|                                                          | Model 1                   |              | Model 2 |              | Model 3 |                |
|                                                          | Est                       | CI           | Est     | CI           | Est     | CI             |
| Intercept                                                | 17.92                     | 6.73,47.7    | 91.21   | 20.18,412.16 | 223.77  | 20.3,2466.82   |
| Experienced Parental Separation                          | 1.10                      | 1.04,1.17    | 1.23    | 1.15,1.32    | 1.22    | 1.14,1.31      |
| Age (Years)                                              | 1.01                      | 1.01,1.02    | 1.00    | 0.99,1.      | 0.995   | 0.992,0.998    |
| Gender (Male vs Female)                                  | 2.24                      | 2.06,2.42    | 2.13    | 1.95,2.32    | 2.41    | 2.21,2.64      |
| Parental Education (Higher Values = Higher Education)    |                           |              | 0.71    | 0.68,0.73    | 0.70    | 0.68,0.73      |
| Participant Education (Higher Values = Higher Education) |                           |              |         |              | 0.88    | 0.86,0.91      |
| Smoking Status                                           |                           |              |         |              | 1.12    | 1.08,1.16      |
| Change in Self-Reported Health                           |                           |              |         |              | 0.99    | 0.97,1.02      |
| Self-Report of Health Change                             |                           |              |         |              | 0.98    | 0.94,1.03      |
| Chronic Condition Index                                  |                           |              |         |              | 0.91    | 0.88,0.94      |
| Change in Functional Limitations                         |                           |              |         |              | 1.09    | 1.07,1.11      |
| BMI                                                      |                           |              |         |              | 0.98    | 0.98,0.98      |
| Hispanic<br>CMV                                          |                           |              |         |              |         |                |
|                                                          | Model 1                   |              | Model 2 |              | Model 3 |                |
|                                                          | Est                       | CI           | Est     | CI           | Est     | CI             |
| Intercept                                                | 2.43                      | 0.04,137.31  | 11.85   | 0.22,628.93  | 414.54  | 1.71,100363.37 |
| Experienced Parental Separation                          | 1.15                      | 0.95,1.39    | 1.48    | 1.23,1.8     | 1.35    | 1.15,1.58      |
| Age (Years)                                              | 1.06                      | 1.06,1.06    | 1.04    | 1.04,1.05    | 1.03    | 1.02,1.03      |
| Gender (Male vs Female)                                  | 1.08                      | 0.86,1.35    | 1.16    | 0.95,1.41    | 1.04    | 0.87,1.25      |
| Parental Education (Higher Values = Higher Education)    |                           |              | 0.60    | 0.57,0.64    | 0.66    | 0.61,0.7       |
| Participant Education (Higher Values = Higher Education) |                           |              |         |              | 0.91    | 0.87,0.94      |
| Smoking Status                                           |                           |              |         |              | 0.66    | 0.58,0.75      |
| Change in Self-Reported Health                           |                           |              |         |              | 0.88    | 0.82,0.95      |
| Self-Report of Health Change                             |                           |              |         |              | 0.61    | 0.53,0.7       |
| Chronic Condition Index                                  |                           |              |         |              | 1.14    | 1.11,1.18      |
| Change in Functional Limitations                         |                           |              |         |              | 0.80    | 0.75,0.86      |
| BMI                                                      |                           |              |         |              | 0.98    | 0.97,0.98      |
| Other Race<br>CMV                                        |                           |              |         |              |         |                |
|                                                          | Model 1                   |              | Model 2 |              | Model 3 |                |
|                                                          | Est                       | CI           | Est     | CI           | Est     | CI             |
| Intercept                                                | 8.08                      | 0.02,2866.37 | 15.23   | 0.56,2612.85 | 3.06    | 0, > 10.0      |
| Experienced Parental Separation                          | 1.36                      | 1.13,1.64    | 1.39    | 1.13,1.71    | 1.52    | 1.2,1.93       |
| Age (Years)                                              | 1.04                      | 1.03,1.04    | 1.04    | 1.03,1.04    | 1.03    | 1.02,1.03      |
| Gender (Male vs Female)                                  | 1.14                      | 0.81,1.59    | 1.06    | 0.71,1.58    | 1.14    | 0.75,1.72      |
| Parental Education (Higher Values = Higher Education)    |                           |              | 0.83    | 0.77,0.9     | 0.87    | 0.81,0.94      |
| Participant Education (Higher Values = Higher Education) |                           |              |         |              | 1.16    | 1.04,1.3       |
| Smoking Status                                           |                           |              |         |              | 0.95    | 0.68,1.33      |
| Change in Self-Reported Health                           |                           |              |         |              | 0.80    | 0.69,0.93      |
| Self-Report of Health Change                             |                           |              |         |              | 1.74    | 1.33,2.26      |
| Chronic Condition Index                                  |                           |              |         |              | 1.08    | 1.03,1.13      |
| Change in Functional Limitations                         |                           |              |         |              | 1.08    | 0.76,1.52      |
| BMI                                                      |                           |              |         |              | 0.996   | 0.99,1.0001    |
| Non-Hispanic White<br>CMV                                |                           |              |         |              |         |                |
|                                                          | Model 1                   |              | Model 2 |              | Model 3 |                |
|                                                          | Est                       | CI           | Est     | CI           | Est     | CI             |
| Intercept                                                | 0.25                      | 0.18,0.34    | 1.87    | 1.17,2.98    | 2.48    | 0.92,6.72      |
| Experienced Parental Separation                          | 1.26                      | 1.23,1.3     | 1.28    | 1.24,1.32    | 1.22    | 1.18,1.26      |
| Age (Years)                                              | 1.05                      | 1.05,1.05    | 1.04    | 1.04,1.04    | 1.04    | 1.04,1.04      |
| Gender (Male vs Female)                                  | 2.21                      | 2.17,2.26    | 2.10    | 2.05,2.15    | 2.12    | 2.07,2.17      |
| Parental Education (Higher Values = Higher Education)    |                           | 0.0.         | 0.63    | 0.63,0.64    | 0.67    | 0.67,0.68      |
| Participant Education (Higher Values = Higher Education) |                           |              |         |              | 0.79    | 0.78,0.8       |
| Smoking Status                                           |                           |              |         |              | 1.12    | 1.11,1.14      |
| Change in Self-Reported Health                           |                           |              |         |              | 1.00    | 0.99,1.01      |
| Self-Report of Health Change                             |                           |              |         |              | 0.90    | 0.88,0.92      |
| Chronic Condition Index                                  |                           |              |         |              | 1.03    | 1.026,1.034    |
| Change in Functional Limitations                         |                           |              |         |              | 0.83    | 0.82,0.84      |
| BMI                                                      |                           |              |         |              | 1.01    | 1.008,1.011    |

**Panel B. sTNFR**

|                                                          | Non-Hispanic Black<br>sTNFR |                |         |                |          |                   |
|----------------------------------------------------------|-----------------------------|----------------|---------|----------------|----------|-------------------|
|                                                          | Model 1                     |                | Model 2 |                | Model 3  |                   |
|                                                          | Est                         | CI             | Est     | CI             | Est      | CI                |
| Intercept                                                | 673.81                      | 637.44,712.26  | 678.66  | 605.48,760.68  | 471.02   | 413.14,537.02     |
| Experienced Parental Separation                          | 1.02                        | 1.,1.03        | 1.01    | 0.99,1.03      | 0.9957   | 0.9806,1.0109     |
| Age (Years)                                              | 1.01                        | 1.01,1.01      | 1.01    | 1.01,1.01      | 1.0116   | 1.0114,1.0119     |
| Gender (Male vs Female)                                  | 1.01                        | 1.01,1.02      | 0.99    | 0.99,1.        | 0.9732   | 0.9676,0.9789     |
| Parental Education (Higher Values = Higher Education)    |                             |                | 0.98    | 0.98,0.98      | 0.9994   | 0.9972,1.0017     |
| Participant Education (Higher Values = Higher Education) |                             |                |         |                | 0.9771   | 0.976,0.9782      |
| Smoking Status                                           |                             |                |         |                | 1.0162   | 1.013,1.0194      |
| Change in Self-Reported Health                           |                             |                |         |                | 0.9892   | 0.9878,0.9905     |
| Self-Report of Health Change                             |                             |                |         |                | 1.0287   | 1.0244,1.033      |
| Chronic Condition Index                                  |                             |                |         |                | 1.0810   | 1.0795,1.0824     |
| Change in Functional Limitations                         |                             |                |         |                | 1.0826   | 1.0789,1.0864     |
| BMI                                                      |                             |                |         |                | 1.0085   | 1.0079,1.0091     |
|                                                          | Hispanic<br>sTNFR           |                |         |                |          |                   |
|                                                          | Model 1                     |                | Model 2 |                | Model 3  |                   |
|                                                          | Est                         | CI             | Est     | CI             | Est      | CI                |
| Intercept                                                | 896.61                      | 778.53,1032.61 | 926.66  | 731.26,1174.28 | 852.05   | 538.85,1347.31    |
| Experienced Parental Separation                          | 0.98                        | 0.97,0.99      | 0.98    | 0.96,0.99      | 0.95     | 0.93,0.96         |
| Age (Years)                                              | 1.01                        | 1.01,1.01      | 1.01    | 1.01,1.01      | 1.01     | 1.01,1.01         |
| Gender (Male vs Female)                                  | 0.97                        | 0.95,0.98      | 0.97    | 0.95,0.98      | 0.93     | 0.92,0.94         |
| Parental Education (Higher Values = Higher Education)    |                             |                | 0.98    | 0.97,0.98      | 1.01     | 1.01,1.02         |
| Participant Education (Higher Values = Higher Education) |                             |                |         |                | 0.96     | 0.95,0.97         |
| Smoking Status                                           |                             |                |         |                | 1.06     | 1.06,1.07         |
| Change in Self-Reported Health                           |                             |                |         |                | 0.94     | 0.94,0.95         |
| Self-Report of Health Change                             |                             |                |         |                | 1.06     | 1.04,1.07         |
| Chronic Condition Index                                  |                             |                |         |                | 1.09     | 1.09,1.09         |
| Change in Functional Limitations                         |                             |                |         |                | 1.04     | 1.04,1.05         |
| BMI                                                      |                             |                |         |                | 1.00     | 1.001,1.002       |
|                                                          | Other Race<br>sTNFR         |                |         |                |          |                   |
|                                                          | Model 1                     |                | Model 2 |                | Model 3  |                   |
|                                                          | Est                         | CI             | Est     | CI             | Est      | CI                |
| Intercept                                                | 452.59                      | 406.57,503.83  | 531.87  | 461.44,613.06  | 464.14   | 309.11,696.91     |
| Experienced Parental Separation                          | 1.03                        | 1.01,1.05      | 1.01    | 0.99,1.03      | 0.97     | 0.95,0.99         |
| Age (Years)                                              | 1.02                        | 1.02,1.02      | 1.02    | 1.02,1.02      | 1.01     | 1.01,1.01         |
| Gender (Male vs Female)                                  | 1.04                        | 1.03,1.05      | 1.07    | 1.06,1.07      | 0.99     | 0.977,0.995       |
| Parental Education (Higher Values = Higher Education)    |                             |                | 0.96    | 0.95,0.96      | 0.99     | 0.99,0.996        |
| Participant Education (Higher Values = Higher Education) |                             |                |         |                | 0.94     | 0.935,0.947       |
| Smoking Status                                           |                             |                |         |                | 0.94     | 0.932,0.945       |
| Change in Self-Reported Health                           |                             |                |         |                | 1.00     | 1.,1.             |
| Self-Report of Health Change                             |                             |                |         |                | 1.03     | 1.02,1.04         |
| Chronic Condition Index                                  |                             |                |         |                | 1.07     | 1.07,1.07         |
| Change in Functional Limitations                         |                             |                |         |                | 1.09     | 1.08,1.1          |
| BMI                                                      |                             |                |         |                | 1.01     | 1.01,1.01         |
|                                                          | Non-Hispanic White<br>sTNFR |                |         |                |          |                   |
|                                                          | Model 1                     |                | Model 2 |                | Model 3  |                   |
|                                                          | Est                         | CI             | Est     | CI             | Est      | CI                |
| Intercept                                                | 611.73                      | 608.43,615.05  | 688.88  | 684.69,693.11  | 465.42   | 459.37,471.56     |
| Experienced Parental Separation                          | 1.04                        | 1.04,1.05      | 1.04    | 1.03,1.04      | 1.020    | 1.017, 1.025      |
| Age (Years)                                              | 1.01                        | 1.01,1.01      | 1.01    | 1.01,1.01      | 1.0129   | 1.01286, 1.012934 |
| Gender (Male vs Female)                                  | 1.00                        | 1.,1.          | 1.00    | 1.,1.          | 1.0017   | 1.001, 1.002      |
| Parental Education (Higher Values = Higher Education)    |                             |                | 0.97    | 0.97,0.97      | 0.9896   | 0.989, 0.99       |
| Participant Education (Higher Values = Higher Education) |                             |                |         |                | 0.9617   | 0.961, 0.962      |
| Smoking Status                                           |                             |                |         |                | 0.9992   | 0.999, 1.00       |
| Change in Self-Reported Health                           |                             |                |         |                | 0.999361 | 0.9991, 0.9996    |
| Self-Report of Health Change                             |                             |                |         |                | 1.018129 | 1.017, 1.019      |
| Chronic Condition Index                                  |                             |                |         |                | 1.05142  | 1.05114, 1.517    |
| Change in Functional Limitations                         |                             |                |         |                | 1.0226   | 1.022,1.023       |
| BMI                                                      |                             |                |         |                | 1.0126   | 1.012,1.013       |

**Panel C. IL-6**

|                                                                 | Non-Hispanic Black<br>IL-6 |             |         |             |         |               |
|-----------------------------------------------------------------|----------------------------|-------------|---------|-------------|---------|---------------|
|                                                                 | Model 1                    |             | Model 2 |             | Model 3 |               |
|                                                                 | Est                        | CI          | Est     | CI          | Est     | CI            |
| <b>Intercept</b>                                                | 1.37                       | 1.15,1.62   | 1.12    | 0.89,1.42   | 0.47    | 0.31,0.72     |
| <b>Experienced Parental Separation</b>                          | 0.93                       | 0.92,0.95   | 0.95    | 0.94,0.97   | 0.93    | 0.92,0.95     |
| <b>Age (Years)</b>                                              | 1.01                       | 1.01,1.02   | 1.02    | 1.02,1.02   | 1.022   | 1.0216,1.023  |
| <b>Gender (Male vs Female)</b>                                  | 1.17                       | 1.15,1.18   | 1.15    | 1.13,1.17   | 1.14    | 1.12,1.15     |
| <b>Parental Education (Higher Values = Higher Education)</b>    |                            |             | 0.96    | 0.95,0.96   | 0.96    | 0.95,0.96     |
| <b>Participant Education (Higher Values = Higher Education)</b> |                            |             |         |             | 1.04    | 1.03,1.04     |
| <b>Smoking Status</b>                                           |                            |             |         |             | 1.13    | 1.12,1.14     |
| <b>Change in Self-Reported Health</b>                           |                            |             |         |             | 1.08    | 1.08,1.09     |
| <b>Self-Report of Health Change</b>                             |                            |             |         |             | 0.98    | 0.97,0.99     |
| <b>Chronic Condition Index</b>                                  |                            |             |         |             | 1.04    | 1.03,1.04     |
| <b>Change in Functional Limitations</b>                         |                            |             |         |             | 0.99    | 0.9883,0.9959 |
| <b>BMI</b>                                                      |                            |             |         |             | 1.016   | 1.01,1.02     |
|                                                                 | Hispanic<br>IL-6           |             |         |             |         |               |
|                                                                 | Model 1                    |             | Model 2 |             | Model 3 |               |
|                                                                 | Est                        | CI          | Est     | CI          | Est     | CI            |
| <b>Intercept</b>                                                | 0.37                       | 0.2,0.7     | 0.26    | 0.13,0.55   | 0.15    | 0.04,0.64     |
| <b>Experienced Parental Separation</b>                          | 0.90                       | 0.87,0.94   | 0.91    | 0.87,0.94   | 0.88    | 0.85,0.91     |
| <b>Age (Years)</b>                                              | 1.03                       | 1.03,1.03   | 1.04    | 1.04,1.04   | 1.04    | 1.03,1.04     |
| <b>Gender (Male vs Female)</b>                                  | 1.19                       | 1.16,1.23   | 1.22    | 1.18,1.26   | 1.15    | 1.11,1.19     |
| <b>Parental Education (Higher Values = Higher Education)</b>    |                            |             | 1.05    | 1.03,1.06   | 1.09    | 1.08,1.11     |
| <b>Participant Education (Higher Values = Higher Education)</b> |                            |             |         |             | 0.91    | 0.9,0.91      |
| <b>Smoking Status</b>                                           |                            |             |         |             | 1.10    | 1.06,1.14     |
| <b>Change in Self-Reported Health</b>                           |                            |             |         |             | 1.03    | 1.02,1.05     |
| <b>Self-Report of Health Change</b>                             |                            |             |         |             | 1.09    | 1.06,1.11     |
| <b>Chronic Condition Index</b>                                  |                            |             |         |             | 1.04    | 1.04,1.05     |
| <b>Change in Functional Limitations</b>                         |                            |             |         |             | 1.06    | 1.04,1.08     |
| <b>BMI</b>                                                      |                            |             |         |             | 1.02    | 1.02,1.02     |
|                                                                 | Other Race<br>IL-6         |             |         |             |         |               |
|                                                                 | Model 1                    |             | Model 2 |             | Model 3 |               |
|                                                                 | Est                        | CI          | Est     | CI          | Est     | CI            |
| <b>Intercept</b>                                                | 1.25                       | 0.63,2.48   | 2.21    | 0.99,4.92   | 0.56    | 0.11,2.82     |
| <b>Experienced Parental Separation</b>                          | 0.83                       | 0.8,0.87    | 0.85    | 0.8,0.89    | 0.89    | 0.87,0.92     |
| <b>Age (Years)</b>                                              | 1.01                       | 1.01,1.02   | 1.01    | 1.01,1.01   | 1.00    | 1.,1.01       |
| <b>Gender (Male vs Female)</b>                                  | 1.14                       | 1.07,1.22   | 1.11    | 1.02,1.21   | 0.90    | 0.87,0.93     |
| <b>Parental Education (Higher Values = Higher Education)</b>    |                            |             | 0.95    | 0.93,0.96   | 1.11    | 1.07,1.15     |
| <b>Participant Education (Higher Values = Higher Education)</b> |                            |             |         |             | 0.76    | 0.72,0.8      |
| <b>Smoking Status</b>                                           |                            |             |         |             | 0.89    | 0.86,0.91     |
| <b>Change in Self-Reported Health</b>                           |                            |             |         |             | 0.87    | 0.83,0.9      |
| <b>Self-Report of Health Change</b>                             |                            |             |         |             | 1.23    | 1.11,1.37     |
| <b>Chronic Condition Index</b>                                  |                            |             |         |             | 1.08    | 1.07,1.08     |
| <b>Change in Functional Limitations</b>                         |                            |             |         |             | 1.04    | 1.01,1.08     |
| <b>BMI</b>                                                      |                            |             |         |             | 1.06    | 1.06,1.06     |
|                                                                 | Non-Hispanic White<br>IL-6 |             |         |             |         |               |
|                                                                 | Model 1                    |             | Model 2 |             | Model 3 |               |
|                                                                 | Est                        | CI          | Est     | CI          | Est     | CI            |
| <b>Intercept</b>                                                | 1.40                       | 1.37,1.44   | 1.66    | 1.59,1.73   | 0.65    | 0.6,0.7       |
| <b>Experienced Parental Separation</b>                          | 1.067                      | 1.06,1.08   | 1.069   | 1.06,1.08   | 1.033   | 1.024,1.042   |
| <b>Age (Years)</b>                                              | 1.017                      | 1.017,1.018 | 1.017   | 1.016,1.017 | 1.016   | 1.016,1.017   |
| <b>Gender (Male vs Female)</b>                                  | 0.920                      | 0.918,0.922 | 0.918   | 0.915,0.92  | 0.931   | 0.929,0.933   |
| <b>Parental Education (Higher Values = Higher Education)</b>    |                            |             | 0.945   | 0.944,0.945 | 0.981   | 0.98,0.982    |
| <b>Participant Education (Higher Values = Higher Education)</b> |                            |             |         |             | 0.950   | 0.949,0.951   |
| <b>Smoking Status</b>                                           |                            |             |         |             | 1.075   | 1.074,1.077   |
| <b>Change in Self-Reported Health</b>                           |                            |             |         |             | 1.009   | 1.008,1.009   |
| <b>Self-Report of Health Change</b>                             |                            |             |         |             | 0.995   | 0.993,0.997   |
| <b>Chronic Condition Index</b>                                  |                            |             |         |             | 1.071   | 1.07,1.072    |
| <b>Change in Functional Limitations</b>                         |                            |             |         |             | 1.042   | 1.04,1.045    |
| <b>BMI</b>                                                      |                            |             |         |             | 1.028   | 1.028,1.029   |

**Panel D. CRP**

|                                                                 | Non-Hispanic Black<br>CRP |               |         |               |         |              |
|-----------------------------------------------------------------|---------------------------|---------------|---------|---------------|---------|--------------|
|                                                                 | Model 1                   |               | Model 2 |               | Model 3 |              |
|                                                                 | Est                       | CI            | Est     | CI            | Est     | CI           |
| <b>Intercept</b>                                                | 1.64                      | 1.,2.71       | 2.08    | 1.15,3.76     | 0.23    | 0.09,0.58    |
| <b>Experienced Parental Separation</b>                          | 0.96                      | 0.92,0.99     | 0.95    | 0.91,0.98     | 0.93    | 0.9,0.97     |
| <b>Age (Years)</b>                                              | 1.000                     | 0.9987,1.0013 | 0.999   | 0.9976,0.9998 | 1.006   | 1.005,1.0069 |
| <b>Gender (Male vs Female)</b>                                  | 1.43                      | 1.4,1.47      | 1.45    | 1.41,1.49     | 1.34    | 1.3,1.37     |
| <b>Parental Education (Higher Values = Higher Education)</b>    |                           |               | 0.87    | 0.86,0.88     | 0.89    | 0.88,0.9     |
| <b>Participant Education (Higher Values = Higher Education)</b> |                           |               |         |               | 1.02    | 1.01,1.03    |
| <b>Smoking Status</b>                                           |                           |               |         |               | 1.16    | 1.15,1.18    |
| <b>Change in Self-Reported Health</b>                           |                           |               |         |               | 1.06    | 1.06,1.07    |
| <b>Self-Report of Health Change</b>                             |                           |               |         |               | 0.97    | 0.95,0.99    |
| <b>Chronic Condition Index</b>                                  |                           |               |         |               | 1.09    | 1.08,1.09    |
| <b>Change in Functional Limitations</b>                         |                           |               |         |               | 1.08    | 1.07,1.09    |
| <b>BMI</b>                                                      |                           |               |         |               | 1.05    | 1.05,1.05    |
|                                                                 | Hispanic<br>CRP           |               |         |               |         |              |
|                                                                 | Model 1                   |               | Model 2 |               | Model 3 |              |
|                                                                 | Est                       | CI            | Est     | CI            | Est     | CI           |
| <b>Intercept</b>                                                | 1.00                      | 0.5,1.98      | 0.75    | 0.34,1.67     | 0.11    | 0.02,0.59    |
| <b>Experienced Parental Separation</b>                          | 0.90                      | 0.86,0.94     | 0.96    | 0.91,1.       | 0.90    | 0.86,0.94    |
| <b>Age (Years)</b>                                              | 1.01                      | 1.01,1.01     | 1.01    | 1.01,1.01     | 1.01    | 1.01,1.02    |
| <b>Gender (Male vs Female)</b>                                  | 1.36                      | 1.3,1.43      | 1.42    | 1.35,1.5      | 1.28    | 1.23,1.34    |
| <b>Parental Education (Higher Values = Higher Education)</b>    |                           |               | 1.05    | 1.03,1.07     | 1.12    | 1.09,1.14    |
| <b>Participant Education (Higher Values = Higher Education)</b> |                           |               |         |               | 0.90    | 0.89,0.91    |
| <b>Smoking Status</b>                                           |                           |               |         |               | 1.10    | 1.07,1.14    |
| <b>Change in Self-Reported Health</b>                           |                           |               |         |               | 1.02    | 1.004,1.032  |
| <b>Self-Report of Health Change</b>                             |                           |               |         |               | 1.19    | 1.15,1.22    |
| <b>Chronic Condition Index</b>                                  |                           |               |         |               | 0.98    | 0.97,0.99    |
| <b>Change in Functional Limitations</b>                         |                           |               |         |               | 1.14    | 1.12,1.15    |
| <b>BMI</b>                                                      |                           |               |         |               | 1.048   | 1.046,1.05   |
|                                                                 | Other Race<br>CRP         |               |         |               |         |              |
|                                                                 | Model 1                   |               | Model 2 |               | Model 3 |              |
|                                                                 | Est                       | CI            | Est     | CI            | Est     | CI           |
| <b>Intercept</b>                                                | 2.83                      | 0.59,13.66    | 7.97    | 1.14,55.58    | 1.37    | 0.04,49.76   |
| <b>Experienced Parental Separation</b>                          | 0.98                      | 0.94,1.03     | 1.04    | 0.98,1.09     | 1.00    | 0.96,1.05    |
| <b>Age (Years)</b>                                              | 0.996                     | 0.994,0.997   | 0.99    | 0.99,0.99     | 0.995   | 0.994,0.996  |
| <b>Gender (Male vs Female)</b>                                  | 1.03                      | 0.97,1.097    | 0.94    | 0.88,1.01     | 0.86    | 0.803,0.915  |
| <b>Parental Education (Higher Values = Higher Education)</b>    |                           |               | 0.86    | 0.85,0.87     | 0.90    | 0.885,0.907  |
| <b>Participant Education (Higher Values = Higher Education)</b> |                           |               |         |               | 1.11    | 1.069,1.152  |
| <b>Smoking Status</b>                                           |                           |               |         |               | 0.97    | 0.942,1.004  |
| <b>Change in Self-Reported Health</b>                           |                           |               |         |               | 1.21    | 1.191,1.225  |
| <b>Self-Report of Health Change</b>                             |                           |               |         |               | 0.79    | 0.762,0.826  |
| <b>Chronic Condition Index</b>                                  |                           |               |         |               | 1.09    | 1.077,1.1    |
| <b>Change in Functional Limitations</b>                         |                           |               |         |               | 1.28    | 1.22,1.35    |
| <b>BMI</b>                                                      |                           |               |         |               | 1.05    | 1.05,1.06    |
|                                                                 | Non-Hispanic White<br>CRP |               |         |               |         |              |
|                                                                 | Model 1                   |               | Model 2 |               | Model 3 |              |
|                                                                 | Est                       | CI            | Est     | CI            | Est     | CI           |
| <b>Intercept</b>                                                | 1.85                      | 1.77,1.93     | 2.32    | 2.19,2.46     | 0.28    | 0.25,0.31    |
| <b>Experienced Parental Separation</b>                          | 1.074                     | 1.063,1.085   | 1.078   | 1.066,1.089   | 1.032   | 1.022,1.043  |
| <b>Age (Years)</b>                                              | 1.000                     | 0.999,1.      | 0.998   | 0.998,0.998   | 1.001   | 1.001,1.001  |
| <b>Gender (Male vs Female)</b>                                  | 1.170                     | 1.166,1.174   | 1.174   | 1.17,1.178    | 1.204   | 1.201,1.208  |
| <b>Parental Education (Higher Values = Higher Education)</b>    |                           |               | 0.934   | 0.933,0.935   | 0.984   | 0.983,0.986  |
| <b>Participant Education (Higher Values = Higher Education)</b> |                           |               |         |               | 0.938   | 0.936,0.94   |
| <b>Smoking Status</b>                                           |                           |               |         |               | 1.121   | 1.119,1.124  |
| <b>Change in Self-Reported Health</b>                           |                           |               |         |               | 0.975   | 0.974,0.976  |
| <b>Self-Report of Health Change</b>                             |                           |               |         |               | 1.080   | 1.077,1.083  |
| <b>Chronic Condition Index</b>                                  |                           |               |         |               | 1.055   | 1.054,1.057  |
| <b>Change in Functional Limitations</b>                         |                           |               |         |               | 1.048   | 1.046,1.051  |
| <b>BMI</b>                                                      |                           |               |         |               | 1.055   | 1.054,1.055  |
