# Supplementary material for: Biological expressions of early life trauma in the immune system of older adults
Source: PubMed Central journal article supplement (PMC10284407; doi:10.1371/journal.pone.0286141), 2023-06-21
Supplement: pone.0286141.s010.pdf [file pone.0286141.s010.pdf]

**S6 Table.** Exponentiated regression coefficients estimating the association between experiencing parental/caregiver loss and parental separation before the age of 16 years and CMV, sTNF, IL-6, and CRP stratified by race/ethnicity. **Model 1** controls for age, gender, and parental education. **Model 2** controls for age, sex, parental education, and state of birth of the respondent. These models were carried out on the non-imputed study sample who were not missing data on state of birth.

|                                     | Non-Hispanic Whites |           |         |           | Non-Hispanic Blacks |           |         |           | Hispanics |           |         |           | Other Race/Ethnicity |           |         |           |
|-------------------------------------|---------------------|-----------|---------|-----------|---------------------|-----------|---------|-----------|-----------|-----------|---------|-----------|----------------------|-----------|---------|-----------|
|                                     | Model 1             |           | Model 2 |           | Model 1             |           | Model 2 |           | Model 1   |           | Model 2 |           | Model 1              |           | Model 2 |           |
|                                     | Est                 | CI        | Est     | CI        | Est                 | CI        | Est     | CI        | Est       | CI        | Est     | CI        | Est                  | CI        | Est     | CI        |
| <b>A. CMV</b>                       |                     |           |         |           |                     |           |         |           |           |           |         |           |                      |           |         |           |
| Experienced Parental/Caregiver Loss | 1.08                | 0.82,1.42 | 1.03    | 0.78,1.36 | 1.52                | 1.01,2.28 | 1.41    | 0.3,6.63  | 1.00      | 0.67,1.5  | 0.99    | 0.53,1.86 | 0.55                 | 0.21,1.44 | 0.51    | 0.28,.91  |
| Experienced Parental Separation     | 1.42                | 1.11,1.83 | 1.32    | 1.04,1.68 | 1.67                | 1.14,2.45 | 1.58    | 1.09,2.3  | 1.55      | 1.07,2.25 | 1.44    | 1.2,1.73  | 1.68                 | 0.75,3.76 | 0.85    | 0.37,1.96 |
| <b>B. IL-6</b>                      |                     |           |         |           |                     |           |         |           |           |           |         |           |                      |           |         |           |
| Experienced Parental/Caregiver Loss | 1.15                | 1.06,1.25 | 1.16    | 1.08,1.25 | 0.96                | 0.85,1.07 | 0.96    | 0.84,1.1  | 1.00      | 0.84,1.19 | 1.02    | 0.94,1.12 | 1.15                 | 0.77,1.7  | 1.26    | 0.96,1.64 |
| Experienced Parental Separation     | 1.08                | 1.01,1.16 | 1.10    | 1.01,1.19 | 0.98                | 0.87,1.11 | 1.00    | 0.86,1.15 | 1.00      | 0.85,1.17 | 1.01    | 0.88,1.16 | 0.78                 | 0.54,1.11 | 0.61    | 0.37,1.01 |
| <b>C. CRP</b>                       |                     |           |         |           |                     |           |         |           |           |           |         |           |                      |           |         |           |
| Experienced Parental/Caregiver Loss | 1.18                | 1.08,1.3  | 1.20    | 1.09,1.31 | 0.91                | 0.74,1.13 | 1.01    | 0.85,1.19 | 0.99      | 0.81,1.21 | 1.03    | 0.92,1.14 | 0.97                 | 0.59,1.61 | 1.05    | 0.82,1.35 |
| Experienced Parental Separation     | 1.09                | 1.,1.18   | 1.09    | 1.,1.2    | 0.95                | 0.77,1.18 | 0.98    | 0.83,1.16 | 0.93      | 0.75,1.15 | 0.92    | 0.83,1.02 | 0.98                 | 0.66,1.46 | 1.25    | 0.83,1.87 |
| <b>D. sTNFR</b>                     |                     |           |         |           |                     |           |         |           |           |           |         |           |                      |           |         |           |
| Experienced Parental/Caregiver Loss | 1.06                | 1.03,1.1  | 1.06    | 1.03,1.1  | 0.99                | 0.9,1.09  | 0.97    | 0.9,1.04  | 0.96      | 0.87,1.05 | 0.97    | 0.93,1.02 | 1.01                 | 0.89,1.16 | 0.98    | 0.87,1.1  |
| Experienced Parental Separation     | 1.00                | 0.97,1.03 | 1.00    | 0.98,1.03 | 0.98                | 0.89,1.07 | 0.98    | 0.9,1.08  | 0.95      | 0.87,1.05 | 0.97    | 0.91,1.03 | 0.96                 | 0.83,1.11 | 0.90    | 0.77,1.06 |

**Model 1** controls for age, sex, and parental education. **Model 2** controls for age, sex, parental education, and state of birth of the respondent.
